# Supplementary material for: Molecular insight into visible light driven photocatalytic hydrogen peroxide synthesis using a heptazine-imide structure
Source: Royal Society of Chemistry journal article supplement (doi:10.1039/d5ta06698k), 2025-11-27
Supplement: d5ta06698k1.pdf [file d5ta06698k1.pdf]

Supplementally Information:

## Molecular insight of visible light driven photocatalytic hydrogen peroxide synthesis using heptazine-imide structure

Yamato Yamanaka<sup>a</sup>, Kohei Sawada<sup>b</sup>, Mizuki Nanke<sup>a</sup>, Xiao-Feng Shen<sup>c</sup>, Jun-Tae Song<sup>a,c</sup>, Tatsuki Abe<sup>d</sup>, Keiji Tanaka<sup>a,b,c,d</sup>, Toshinori Matsushima<sup>a,b,c,e</sup>, Miki Inada<sup>a,c</sup>, Tatsumi Ishihara<sup>a,b,c,e</sup> and Motonori Watanabe<sup>a,b,c,e\*</sup>

<sup>a</sup> Department of Applied Chemistry, Graduate School of Engineering, Kyushu University, 744 Motoooka, Nishi-ku, Fukuoka, 8190385, Japan

<sup>b</sup> Department of Automotive Science, Graduate School of Integrated Frontier Sciences, Kyushu University, 744 Motoooka, Nishi-ku, Fukuoka, 8190385, Japan

<sup>c</sup> International Institute for Carbon Neutral Research (PCNER), Kyushu University, 744 Motoooka, Nishi-ku, Fukuoka, 8190385, Japan

<sup>d</sup> Center for Polymer Interface and Molecular Adhesion Science, Kyushu University, 744 Motoooka, Nishi-ku, Fukuoka, 8190385, Japan

<sup>e</sup> Center for Energy Systems Design (CESD), Kyushu University, 744 Motoooka, Nishi-ku, Fukuoka 8190395, Japan

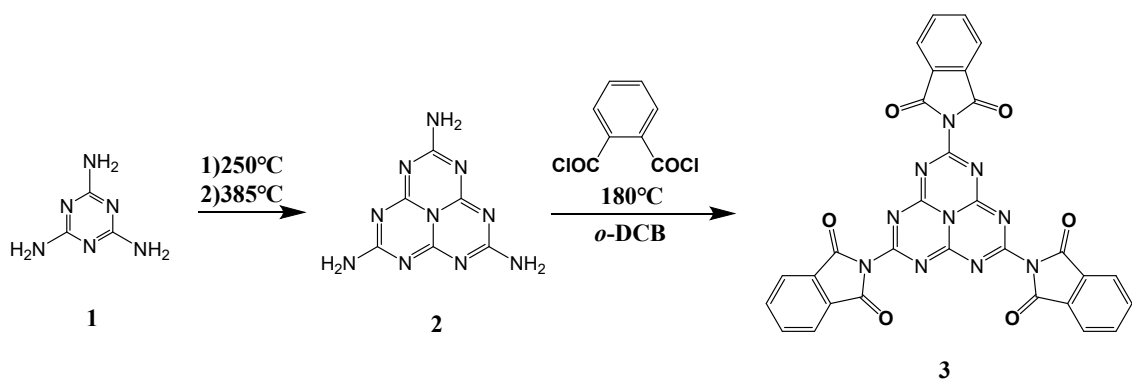

Scheme S1. Synthesis of **2** and **3**.

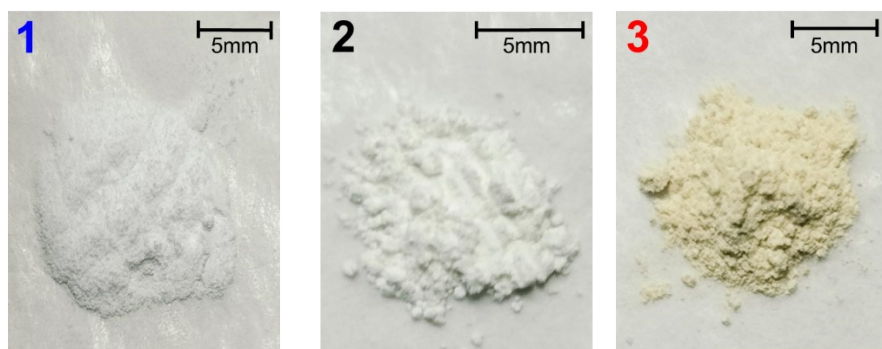

Figure S1. photographic images of **1-3**.

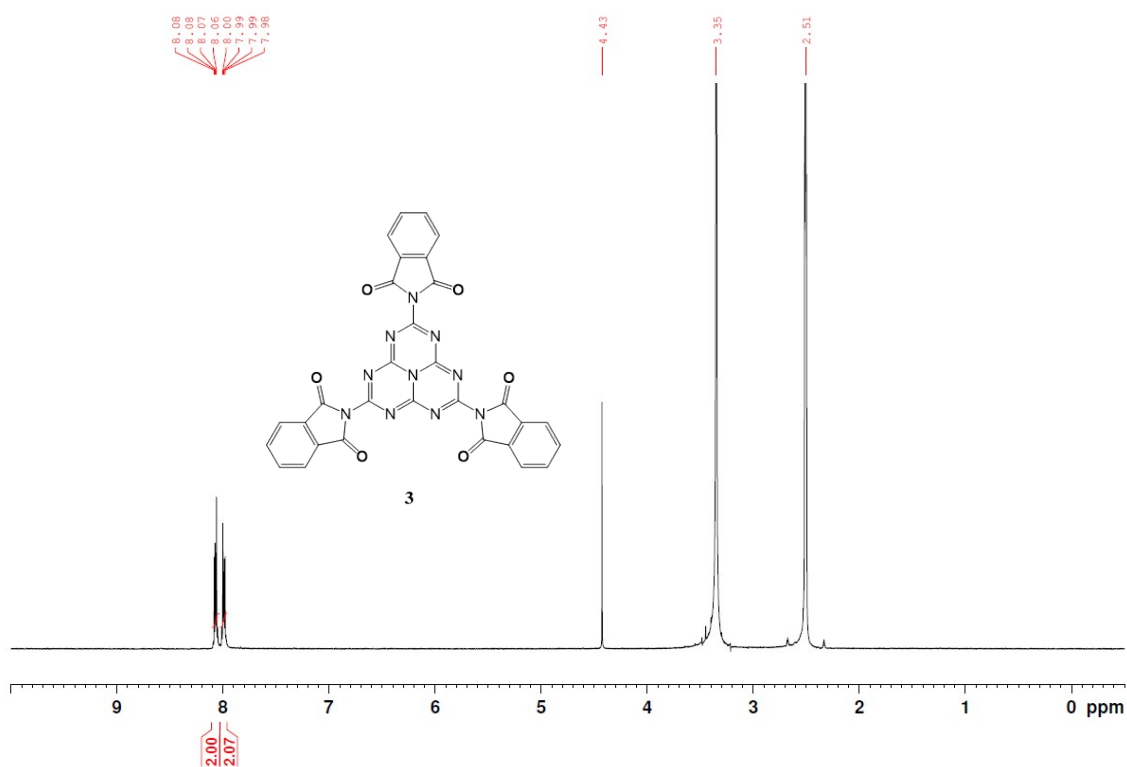

Figure S2. <sup>1</sup>H NMR spectrum of compound **3** in DMSO.

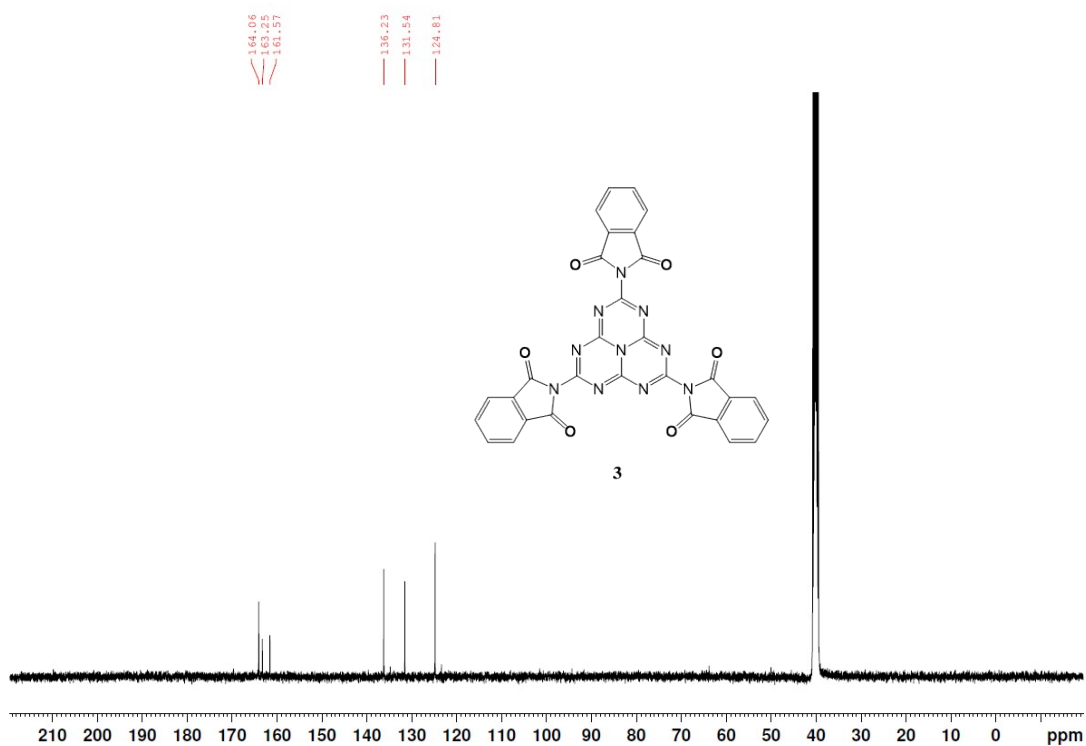

Figure S3. <sup>13</sup>C NMR spectrum of compound **3** in DMSO.

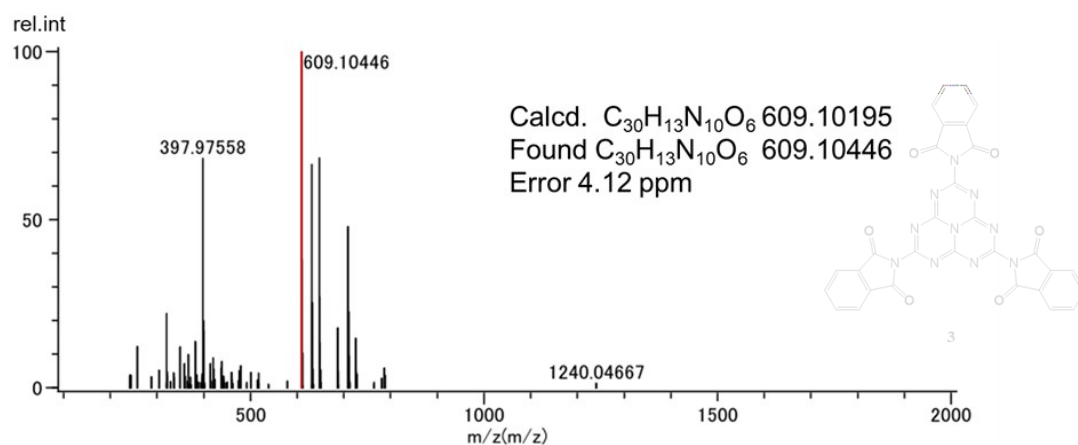

Figure S4. HRESI-MS spectrum of compound **3**.

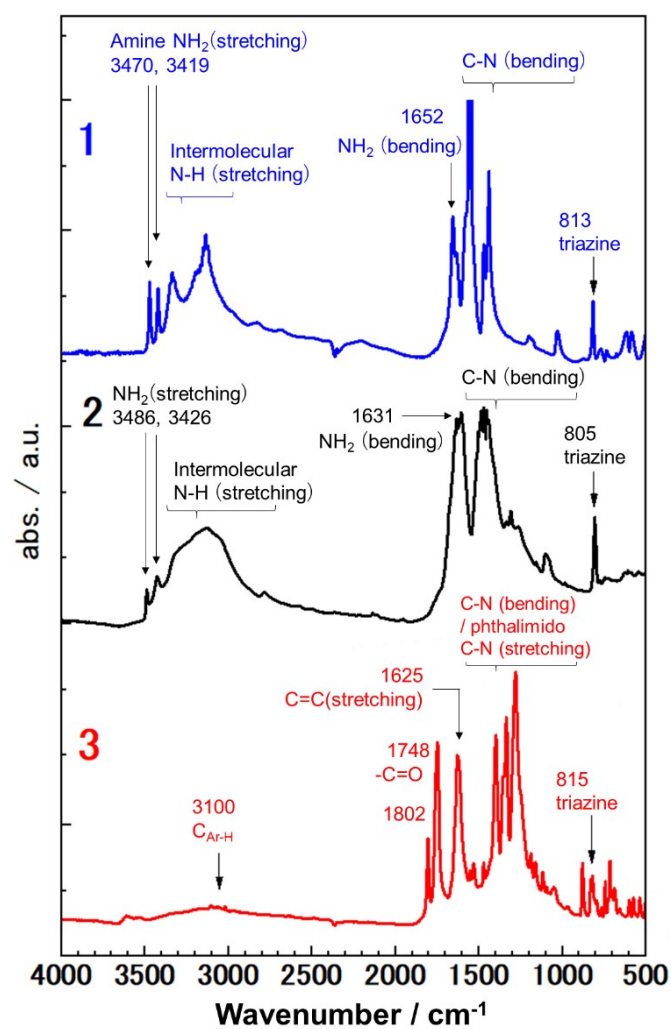

Figure S5. ATR-IR spectra of **1-3**.

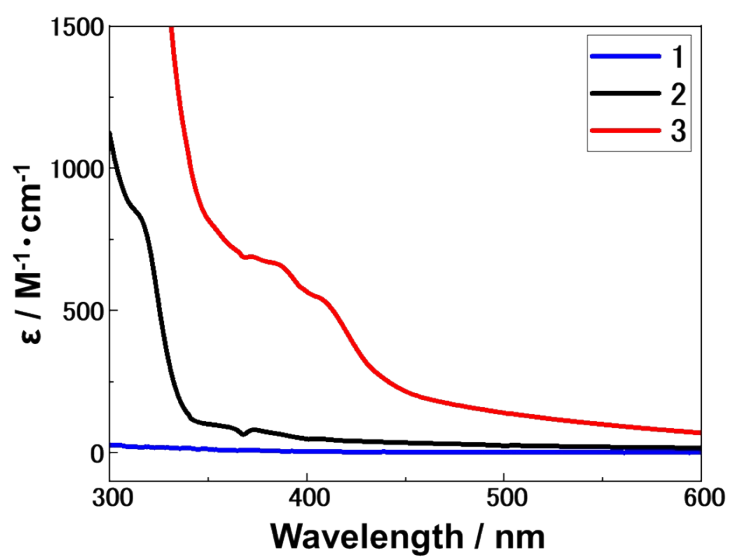

Figure S6. Absorption spectra of **1-3** in DMSO solution.

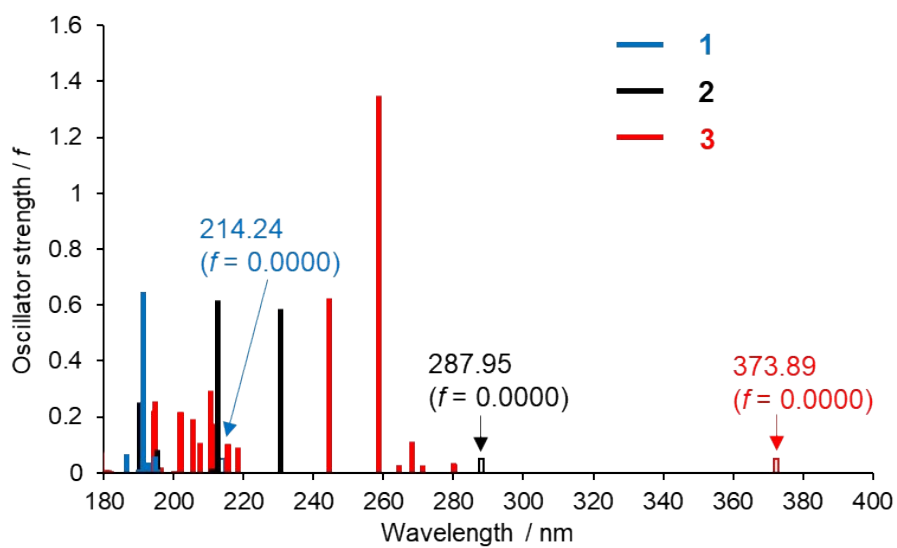

Figure S7. TDDFT generated energy transitions of **1-3**.

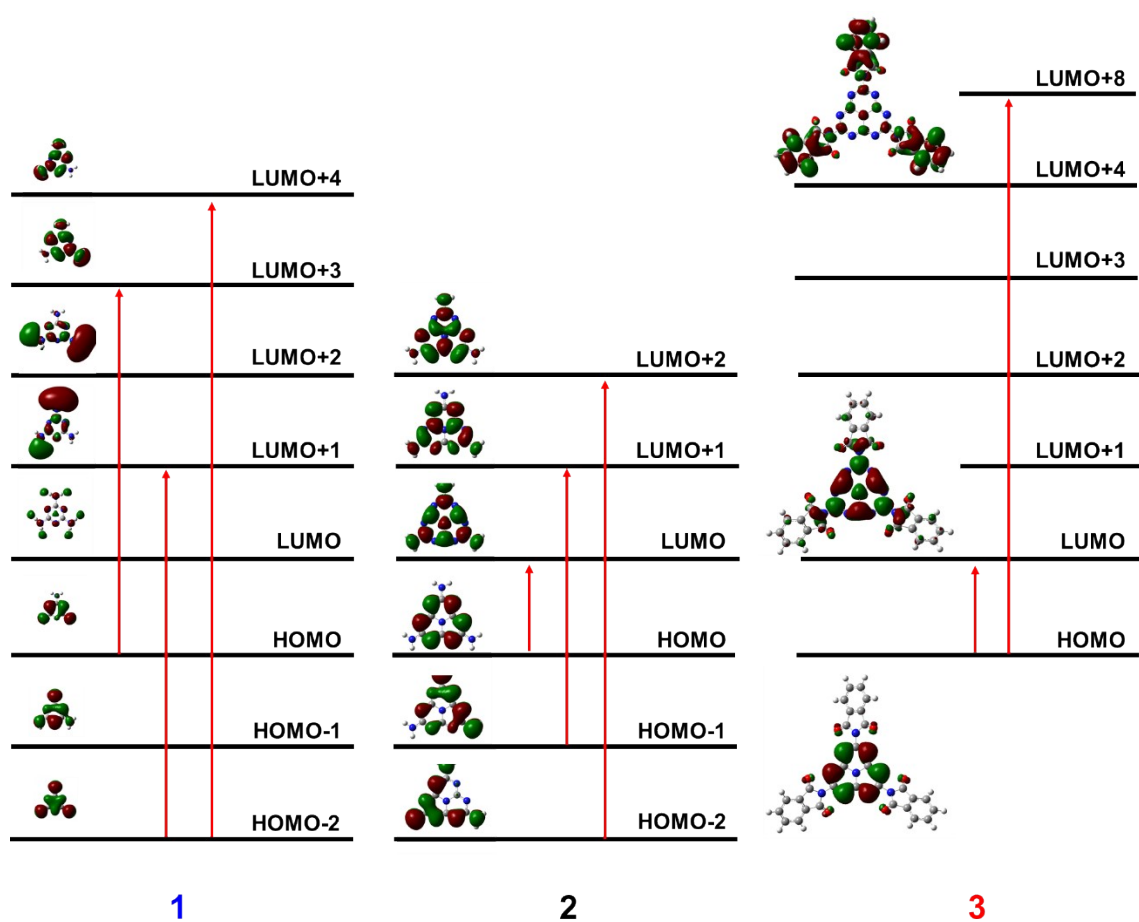

Figure S8. MO for lowest energy transition of 1-3.

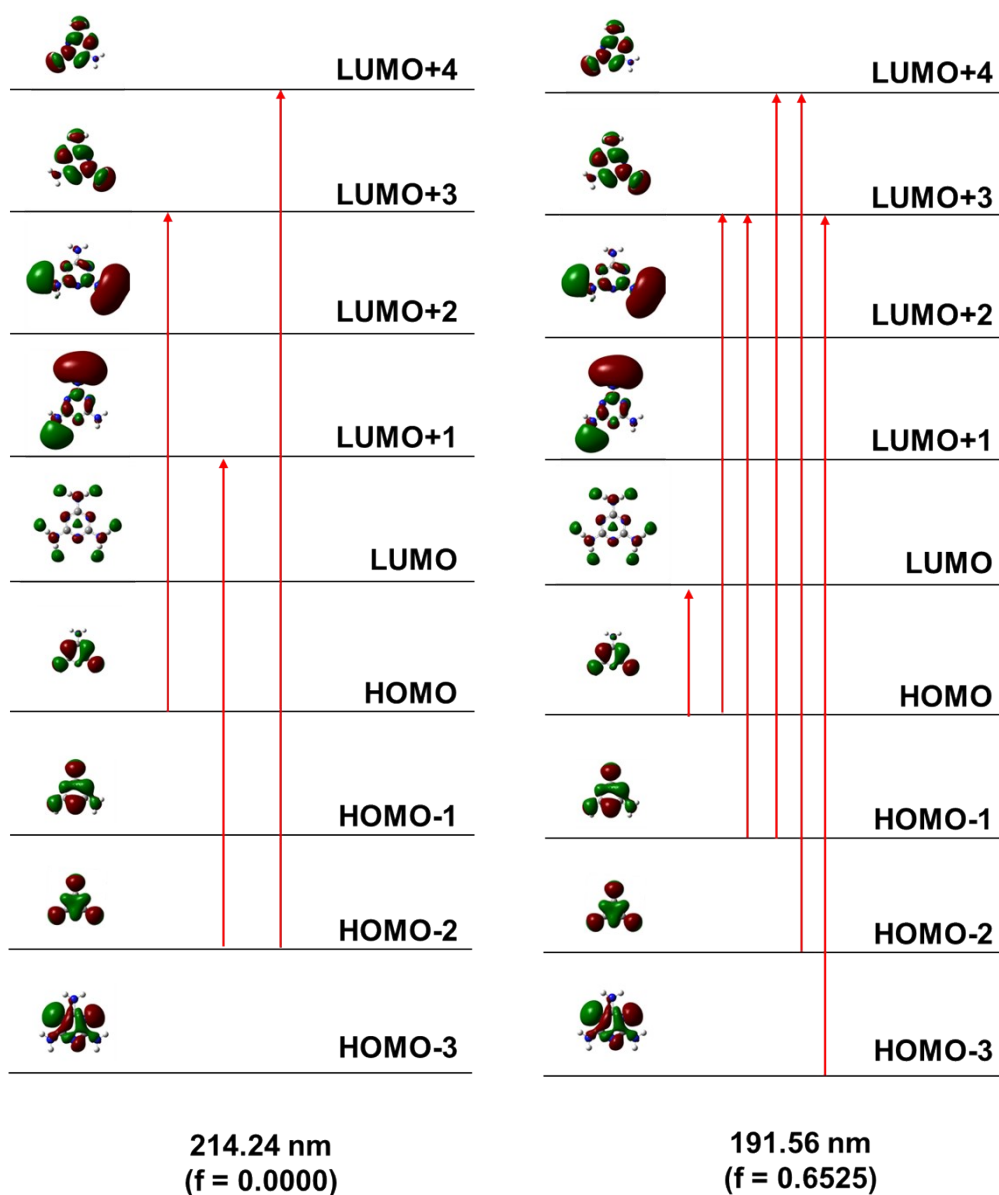

Figure S9. MO for main energy transitions of **1**.

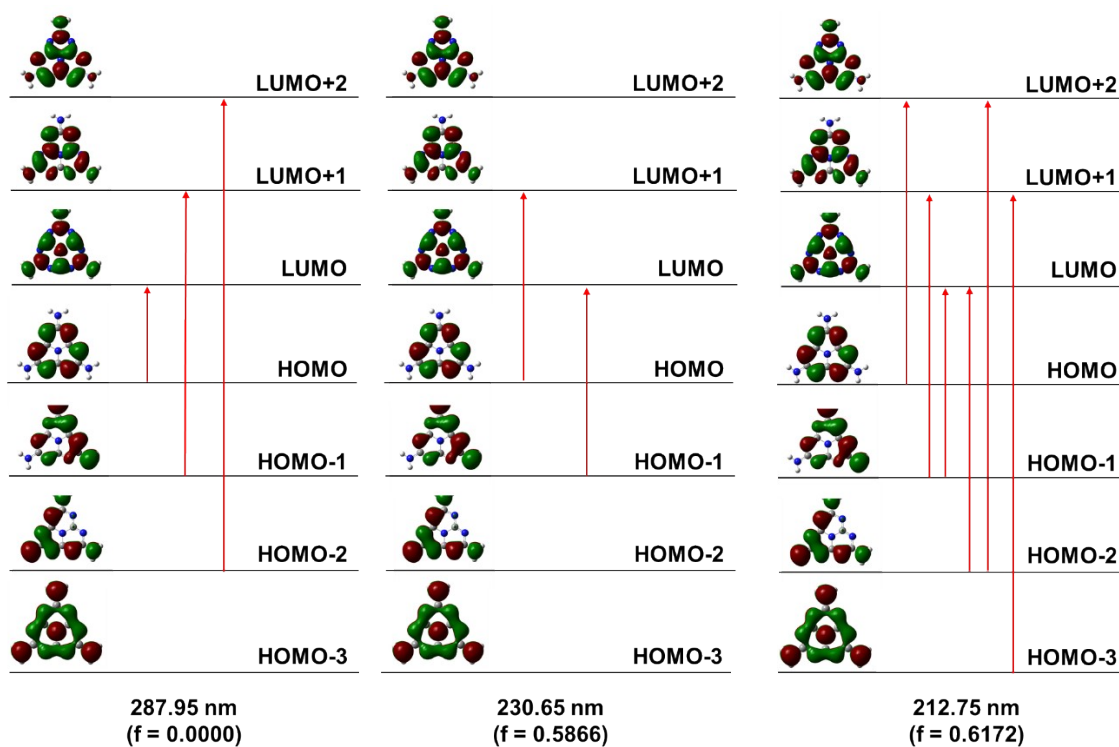

Figure S10. MO for main energy transitions of **2**.



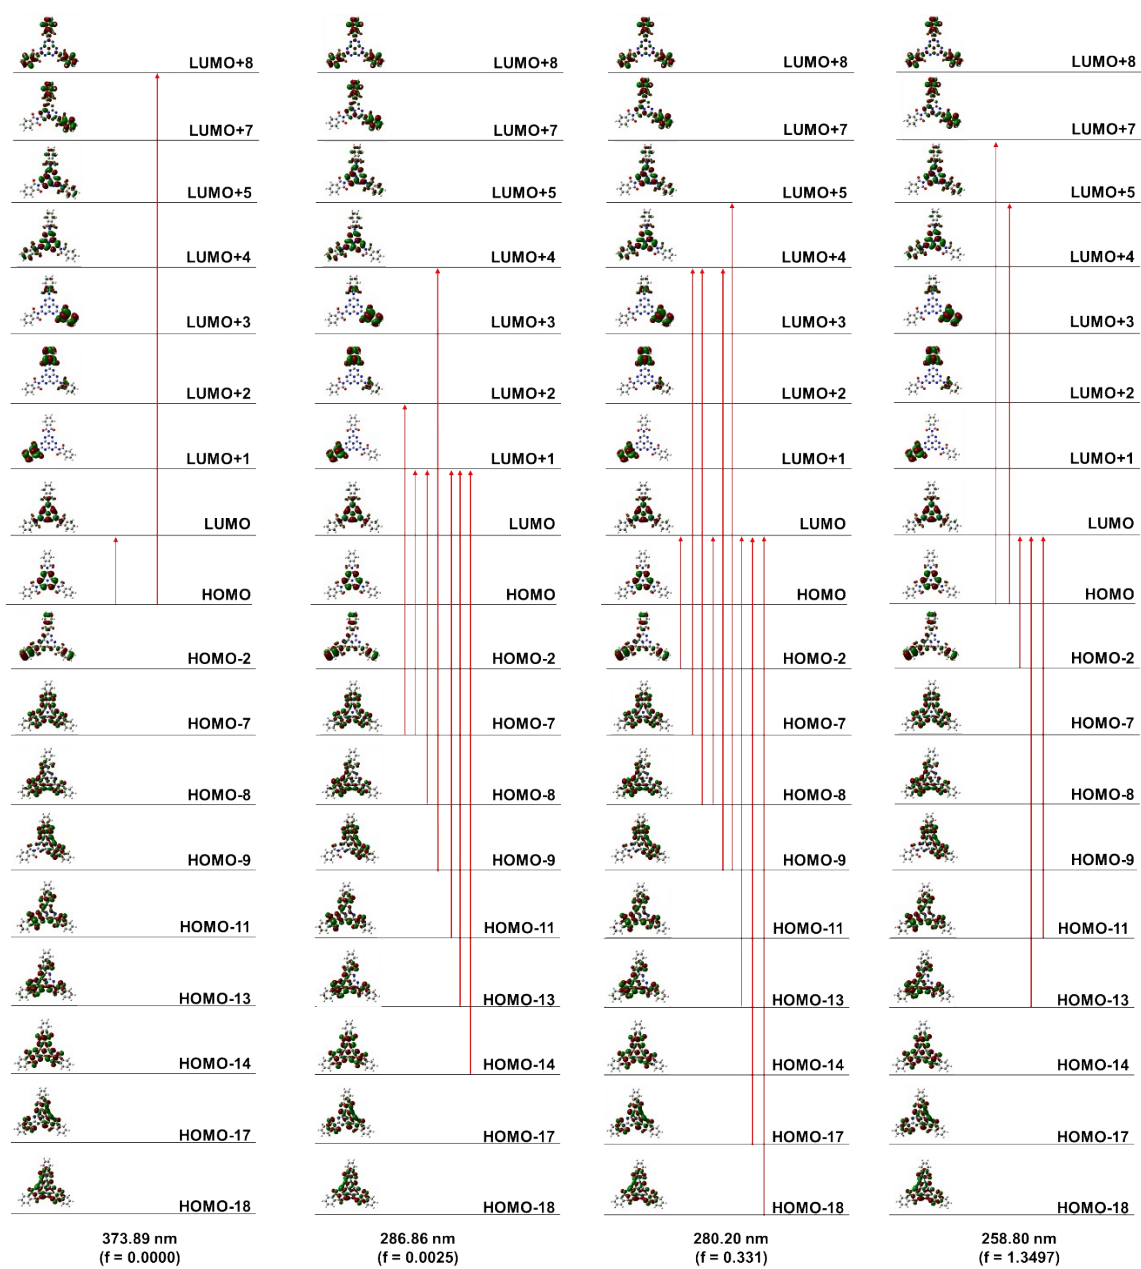

Figure S11. MO for main energy transitions of **3**.

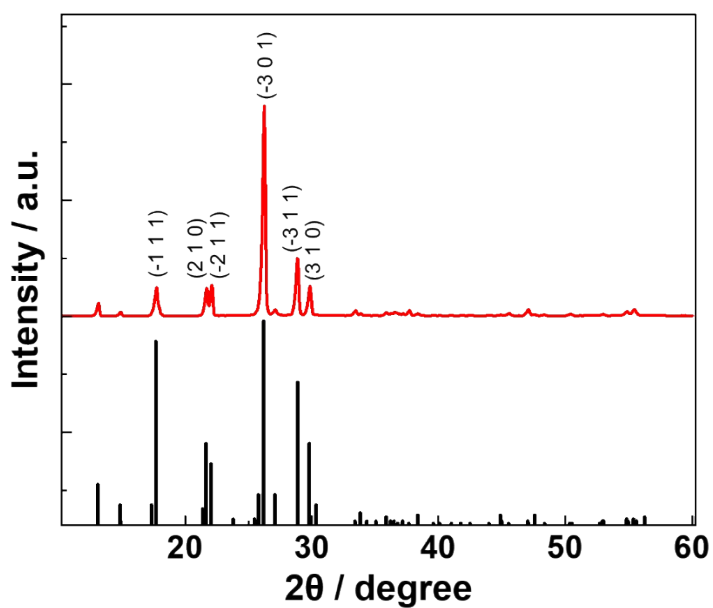

Figure S12. XRD patterns of **1**. (Red; experimental, black; reference)  
XRD pattern referred from ICDD No.00-024-1654.

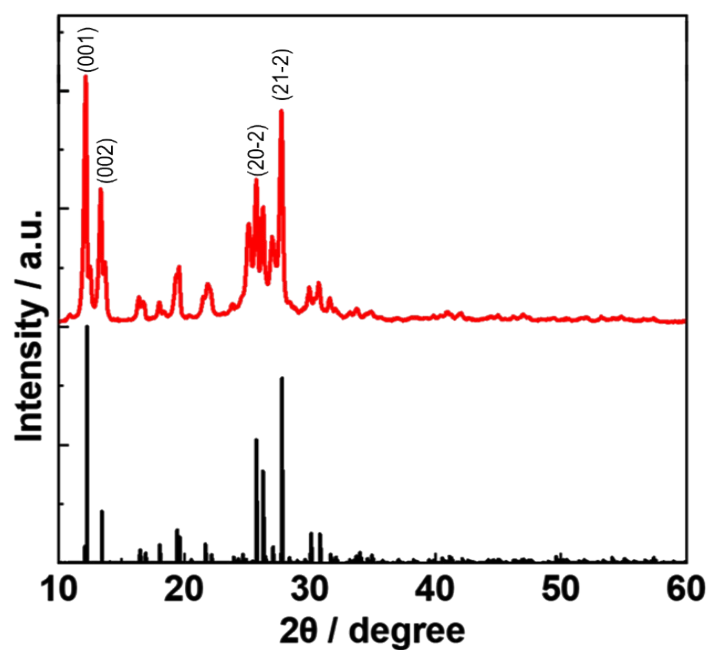

Figure S13. XRD patterns of **2**. (Red; experimental, black; simulated)  
Simulated XRD pattern of **2** was obtained from CCDC deposition number 639493.

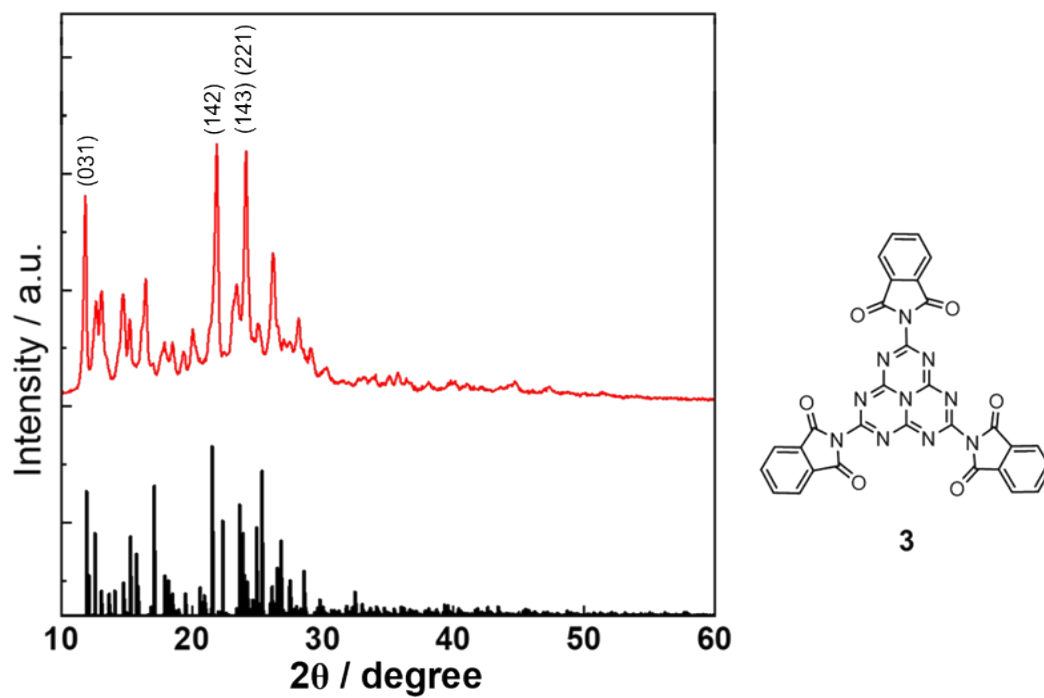

Figure S14. XRD patterns of **3**. (Red; experimental, black; simulated)

Simulated XRD pattern of **3** was obtained from CCDC deposition number 868710.

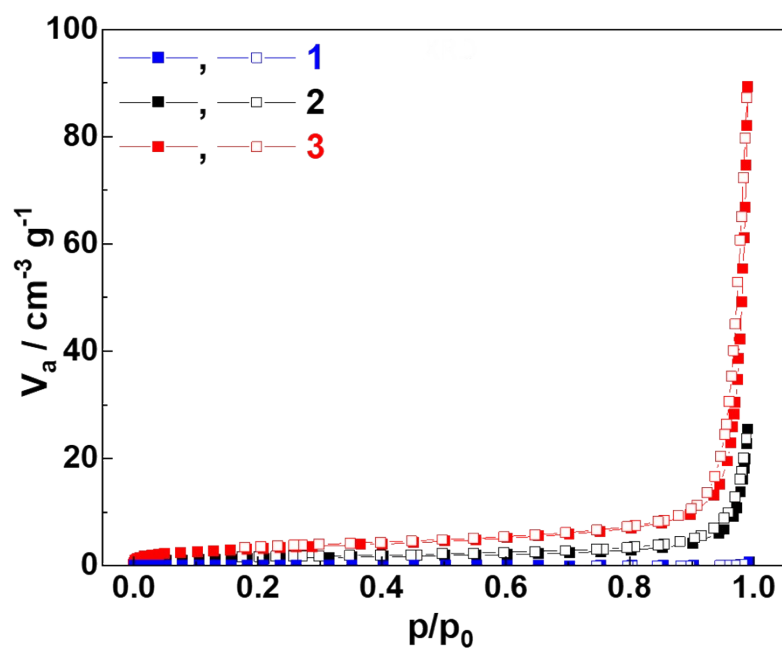

Figure S15. N<sub>2</sub> isotherms of **1-3**. (Adsorption; solid dots, desorption; open square)

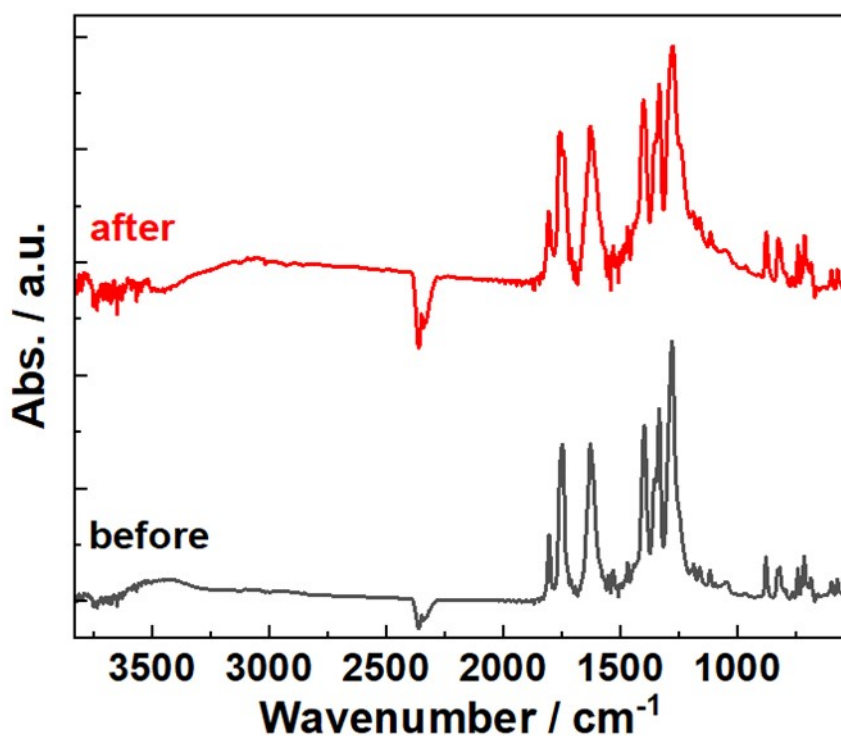

Figure S16. IR spectra of **3** before and after the photocatalytic H<sub>2</sub>O<sub>2</sub> production reaction.

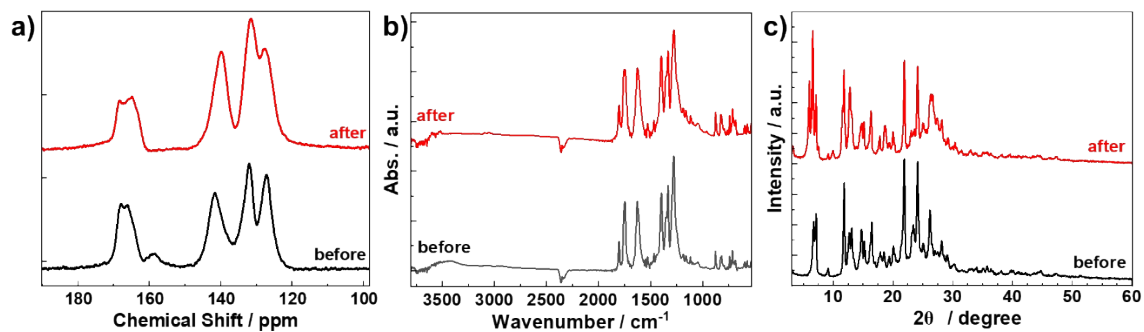

Figure S17. The result of **3** before and after the photocatalytic H<sub>2</sub>O<sub>2</sub> production cycle test.

a) solid-state NMR spectra, b) IR spectra, c) XRD pattern

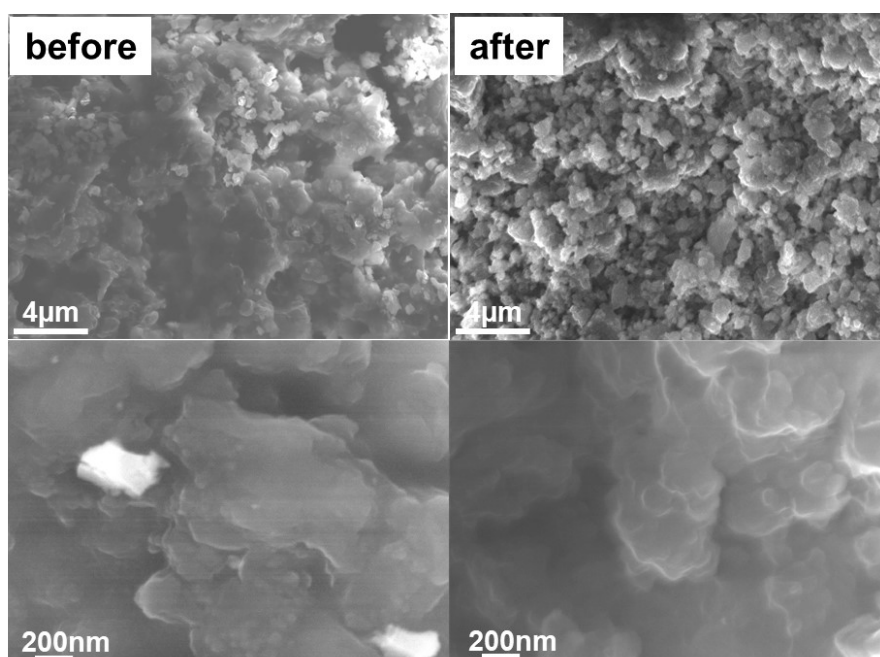

Figure S18. SEM images of **3** before and after the photocatalytic  $\text{H}_2\text{O}_2$  production cycle test.

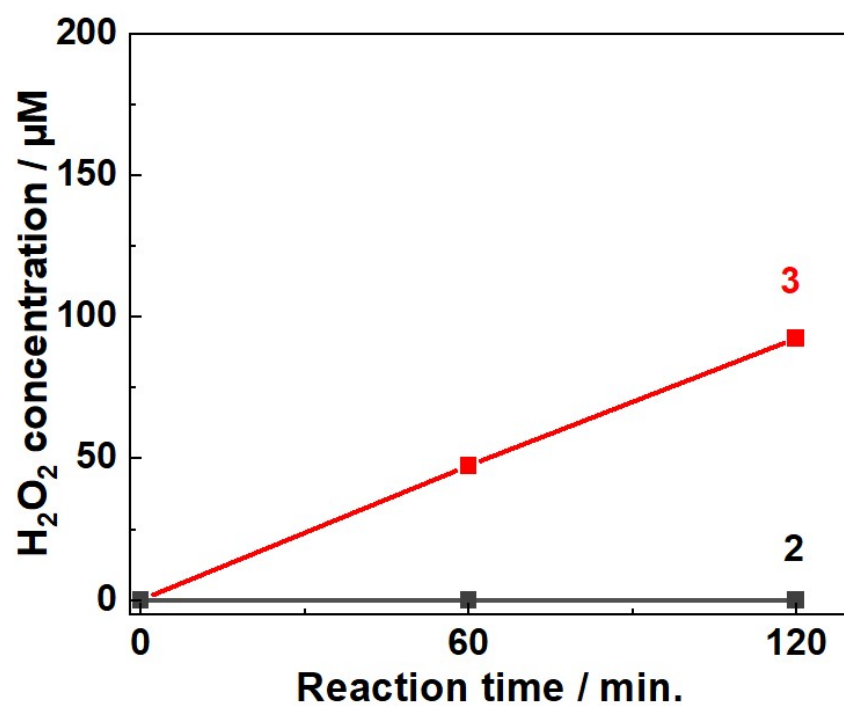

Figure S19. Photocatalytic  $\text{H}_2\text{O}_2$  production test without ethanol at pH =7 (no sacrificial reagent).

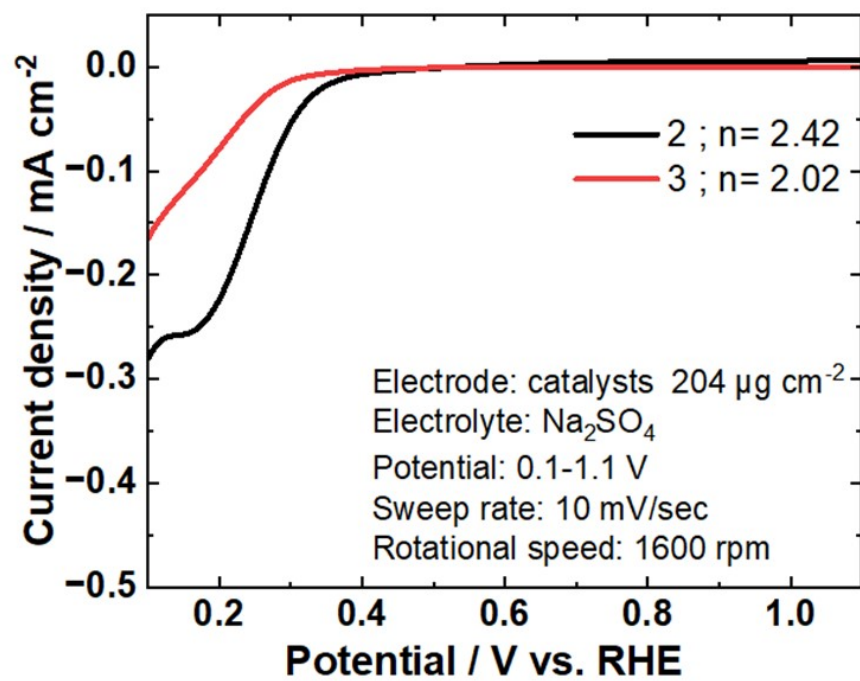

Figure S20. RRDE measurements in O<sub>2</sub>-saturated phosphate-buffered 0.1M Na<sub>2</sub>SO<sub>4</sub> aqueous.

Table S1. Decomposition of C1s, O1s, and N1s

C 1s - before

| Name        | C-C/C=C<br>284.6 eV | C-N<br>286.0 eV |  | C=N-C<br>288.2 eV | $\pi - \pi^*$<br>289.7 eV |
|-------------|---------------------|-----------------|--|-------------------|---------------------------|
| Peak energy | 284.60              | 286.05          |  | 288.16            | 289.70                    |
| FWHM        | 1.38                | 1.92            |  | 1.47              | 4.06                      |
| Area(%)     | 38.60               | 13.01           |  | 34.16             | 14.23                     |

C 1s - after

| Name        | C-C/C=C<br>284.6 eV | C-N<br>286.0 eV | C-O<br>287.2eV | C=N-C<br>288.4 eV | $\pi - \pi^*$<br>290.0 eV |
|-------------|---------------------|-----------------|----------------|-------------------|---------------------------|
| Peak energy | 284.65              | 286.00          | 287.20         | 288.45            | 290.00                    |
| FWHM        | 1.35                | 1.92            | 1.23           | 1.47              | 2.47                      |
| Area(%)     | 38.94               | 12.85           | 11.36          | 28.76             | 8.09                      |

O 1s - before

| Name        | C=O<br>531.9 eV | OH<br>534.7 eV |
|-------------|-----------------|----------------|
| Peak energy | 531.90          | 534.70         |
| FWHM        | 2.14            | 1.89           |
| Area(%)     | 56.62           | 43.38          |

N 1s - before

| Name        | C=N<br>398.6 eV | C-N<br>400.2 eV |
|-------------|-----------------|-----------------|
| Peak energy | 398.60          | 400.20          |
| FWHM        | 1.42            | 2.37            |
| Area(%)     | 52.74           | 47.26           |

O 1s - after

| Name        | C=O<br>531.9 eV | OH<br>534.7 eV | C-O<br>535.2 eV |
|-------------|-----------------|----------------|-----------------|
| Peak energy | 531.90          | 534.70         | 535.62          |
| FWHM        | 2.40            | 1.71           | 0.96            |
| Area(%)     | 49.38           | 45.62          | 4.99            |

N 1s - after

| Name        | C=N<br>398.6 eV | C-N<br>400.2 eV |
|-------------|-----------------|-----------------|
| Peak energy | 398.60          | 400.20          |
| FWHM        | 1.38            | 2.76            |
| Area(%)     | 38.87           | 61.13           |

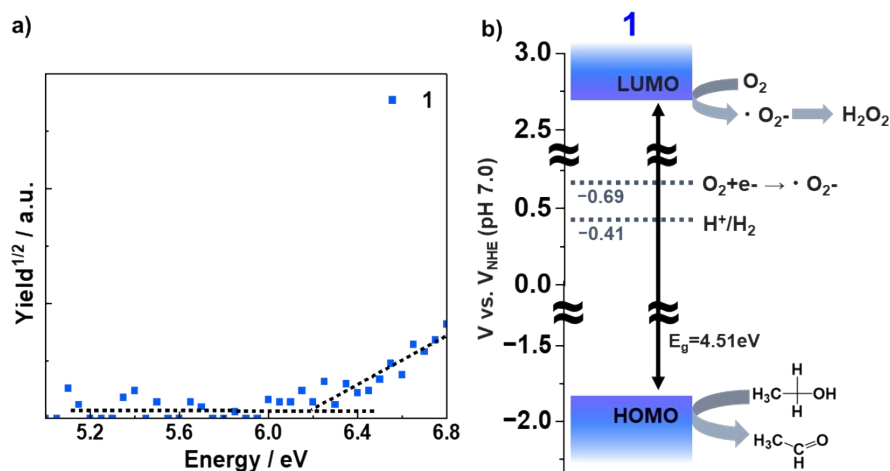

Figure S21. a) PYS of **1**, b) Schematic illustration of the electronic band structure and redox potential alignment (vs. NHE at pH 7.0) of **1**.

The HOMO of **1** was calculated to be -6.24 eV (vs. vacuum). Gap<sub>HOMO-LUMO</sub> was estimated as 4.51 eV from the edge of absorption spectra in Figure 2. From these results, the LUMO of **1** was estimated to be -1.73 eV (vs. vacuum), which was corresponding to the HOMO to be +1.80 eV (vs. NHE) and LUMO to be -2.71 eV (vs. NHE).

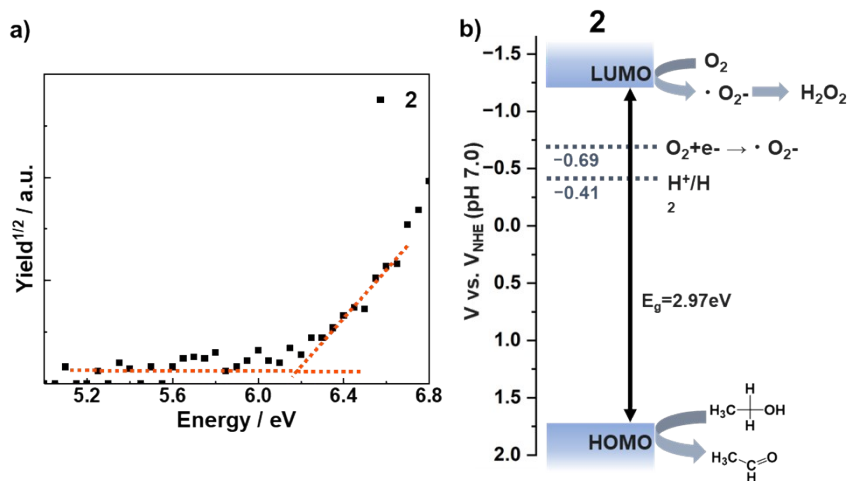

Figure S22. a) PYS of **2**, b) Schematic illustration of the electronic band structure and redox potential alignment (vs. NHE at pH 7.0) of **2**.

The HOMO of **2** was calculated to be -6.18 eV (vs. vacuum). Gap<sub>HOMO-LUMO</sub> was estimated as 2.97 eV from the edge of absorption spectra in Figure 2. From these results, the LUMO of **2** was estimated to be -3.21 eV (vs. vacuum), which was corresponding to the HOMO to be +1.74 eV (vs. NHE) and LUMO to be -1.23 eV (vs. NHE).



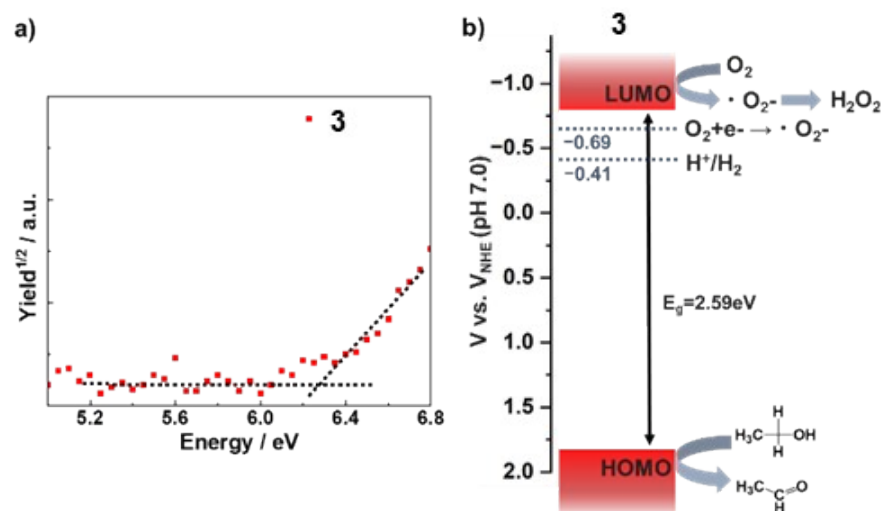

Figure S23. a) PYS of **3**, b) Schematic illustration of the electronic band structure and redox potential alignment (vs. NHE at pH 7.0) of **3**.

The HOMO of **3** was calculated to be -6.26 eV (vs. vacuum). Gap<sub>HOMO-LUMO</sub> was estimated as 2.59 eV from absorption edge in Figure 2. Therefore, the LUMO of **3** was estimated to be -3.67 eV (vs. vacuum), which was corresponding to the HOMO to be +1.82 eV (vs. NHE) and LUMO to be -0.77 eV (vs NHE).

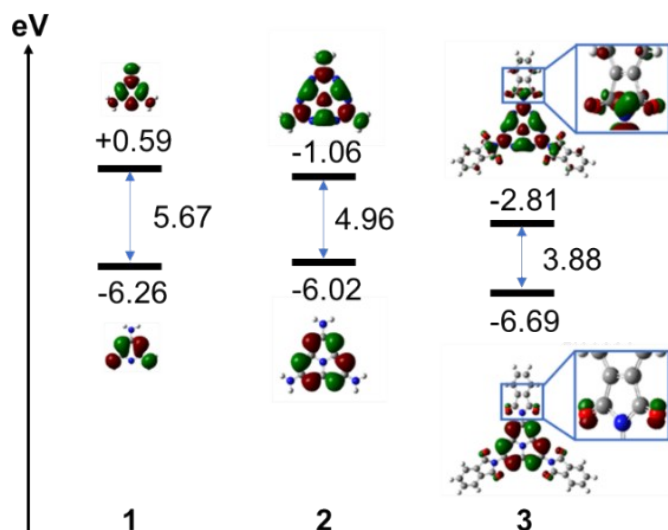

Figure S24. HOMO and LUMO energy diagram of **1-3**.

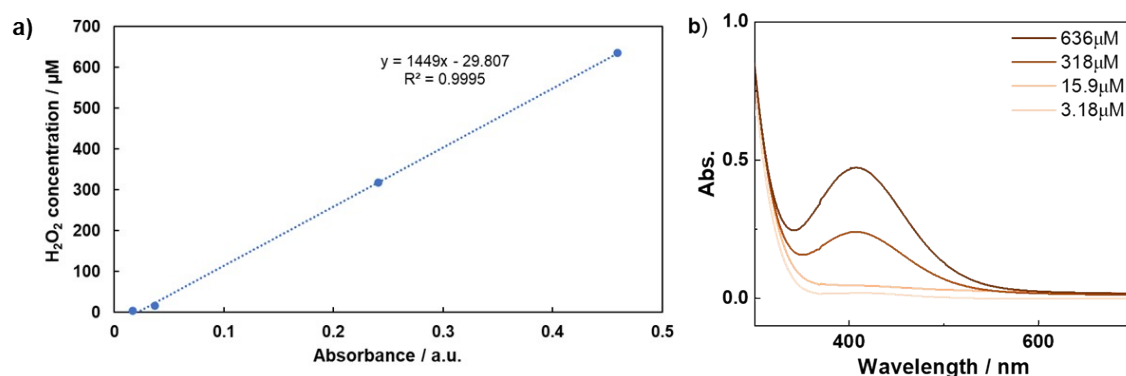

Figure S25. a) Standard calibration curve and b) corresponding spectra for the activity measurements.

Table S2. Summary of  $\text{H}_2\text{O}_2$  production performance with heptazine-based polymers and molecules with alcohol/ $\text{O}_2$  sacrificial conditions.

| Sample                                                                  | State   | Condition                | Light source                                    | $\text{H}_2\text{O}_2$<br>[ $\mu\text{mol}/\text{h}\cdot\text{g}$ ] | Ref. |
|-------------------------------------------------------------------------|---------|--------------------------|-------------------------------------------------|---------------------------------------------------------------------|------|
| $\text{C}_3\text{N}_4$                                                  | Polymer | 10% EtOH / $\text{O}_2$  | 2kW Xe lamp<br>( $\lambda > 420 \text{ nm}$ )   | 125                                                                 | [1]  |
| <b>M</b><br>( $\text{C}_3\text{N}_4$ from melamine)                     | Polymer | 10% EtOH / $\text{O}_2$  | 300 W Xe lamp<br>( $> 420 \text{ nm}$ )         | < 200                                                               | [2]  |
| <b>T</b><br>( $\text{C}_3\text{N}_4$ from thiourea)                     | Polymer | 10% EtOH / $\text{O}_2$  | 300 W Xe lamp<br>( $> 420 \text{ nm}$ )         | < 200                                                               | [2]  |
| <b>MT</b><br>( $\text{C}_3\text{N}_4$ from<br>melamine/thiourea)        | Polymer | 10% EtOH / $\text{O}_2$  | 300 W Xe lamp<br>( $> 420 \text{ nm}$ )         | 250                                                                 | [2]  |
| <b>KMT</b><br>( $\text{C}_3\text{N}_4$ from<br>KCl/melamine/thiourea)   | Polymer | 10% EtOH / $\text{O}_2$  | 300 W Xe lamp<br>( $> 420 \text{ nm}$ )         | 600                                                                 | [2]  |
| <b>AKMT</b><br>( $\text{C}_3\text{N}_4$ from<br>NaOH/melamine/thiourea) | Polymer | 10% EtOH / $\text{O}_2$  | 300 W Xe lamp<br>( $> 420 \text{ nm}$ )         | 3600                                                                | [2]  |
| <b>KTTCN</b><br>(K containing $\text{C}_3\text{N}_4$ )                  | Polymer | 0.5 % IPA / $\text{O}_2$ | 300 W Xe lamp<br>( $\lambda > 420 \text{ nm}$ ) | 720                                                                 | [3]  |
| <b>NCNT</b><br>(3D network of $\text{C}_3\text{N}_4$ tube)              | Polymer | 10% EtOH / $\text{O}_2$  | 300 W Xe lamp<br>( $> 420 \text{ nm}$ )         | 486                                                                 | [4]  |
| <b>ACN</b><br>HDMP grafted $\text{C}_3\text{N}_4$                       | Polymer | 10% IPA / $\text{O}_2$   | 300 W Xe lamp<br>( $\lambda > 420 \text{ nm}$ ) | 174                                                                 | [5]  |

|                                                                          |                 |                              |                                        |     |             |
|--------------------------------------------------------------------------|-----------------|------------------------------|----------------------------------------|-----|-------------|
| <b>SS-CN<br/>(sulfur doped<br/>C<sub>3</sub>N<sub>4</sub> nanosheet)</b> | Polymer         | 10% IPA / O <sub>2</sub>     | 300 W Xe lamp<br>( $\lambda > 420$ nm) | 567 | [6]         |
| <b>1</b>                                                                 | <b>Molecule</b> | 10% EtOH /<br>O <sub>2</sub> | 300 W Xe lamp                          | 0   | [This work] |
| <b>2</b>                                                                 | <b>Molecule</b> | 10% EtOH /<br>O <sub>2</sub> | 300 W Xe lamp<br>( $\lambda > 390$ nm) | 257 | [This work] |
| <b>3</b>                                                                 | <b>Molecule</b> | 10% EtOH /<br>O <sub>2</sub> | 300 W Xe lamp<br>( $\lambda > 390$ nm) | 479 | [This work] |

- [1] Y. Shiraishi, S. Kanazawa, Y. Sugano, D. Tsukamoto, H. Sakamoto, S. Ichikawa, T. Hirai, *ACS Catal.* 2014, **4**, 774–780.
- [2] P. Zhang, Y. Tong, Y. Liu, J. J. M. Vequizo, H. Sun, C. Yang, A. Yamakata, F. Fan, W. Lin, X. Wang, W. Choi, *Angew. Chem. Int. Ed.*, 2020, **59**, 16209-16217.
- [3] J. Zhang, C. Yu, J. Lang, Y. Zhou, B. Zhou, Y. H. Hu, M. Long, *Appl. Catal. B*, 2020, **277**, 119225
- [4] X. Yu, C. Hu, D. Hao, G. Liu, R. Xu, X. Zhu, X. Yu, Y. Ma, L. Ma, *Solar RRL*, 2021, **5**, 2000827
- [5] Y. Yang, G. Zeng, D. Huang, C. Zhang, D. He, C. Zhou, W. Wang, W. Xiong, X. Li, B. Li, W. Dong, Y. Zhou, *Appl. Catal. B*, 2020, **272**, 118970.
- [6] C. Fenga, L. Tanga, Y. Deng, J. Wang, Y. Liu, X. Ouyang, H. Yang, J. Yu, J. Wang, *Appl. Catal. B*, 2021, **281**, 119539.
